# Supplementary material for: The object-specific flood damage database HOWAS 21
Source: Copernicus journal article supplement (doi:10.5194/nhess-20-2503-2020), 2020-09-22
Supplement: Supplementary file 1 [file nhess-20-2503-2020-supplement.pdf]

Supplement of Nat. Hazards Earth Syst. Sci., 20, 2503–2519, 2020  
<https://doi.org/10.5194/nhess-20-2503-2020-supplement>  
© Author(s) 2020. This work is distributed under  
the Creative Commons Attribution 4.0 License.

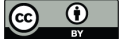

*Supplement of*

## **The object-specific flood damage database HOWAS 21**

**Patric Kellermann et al.**

*Correspondence to:* Heidi Kreibich ([heidi.kreibich@gfz-potsdam.de](mailto:heidi.kreibich@gfz-potsdam.de))

The copyright of individual parts of the supplement might differ from the CC BY 4.0 License.

**Table S1.** Examples of natural hazard damage databases providing information on flood impacts. This list of databases is not exhaustive.

| Database                   | Holder institution                                                                            | Spatial coverage                                                          | Spatial resolution            | Temporal coverage | Recording thresholds                                                                                                              | Data sources                                                                                                                   | Accessibility    | Description / reference | URL                                                                                                                                             |
|----------------------------|-----------------------------------------------------------------------------------------------|---------------------------------------------------------------------------|-------------------------------|-------------------|-----------------------------------------------------------------------------------------------------------------------------------|--------------------------------------------------------------------------------------------------------------------------------|------------------|-------------------------|-------------------------------------------------------------------------------------------------------------------------------------------------|
| AJDA                       | Administration of the Republic of Slovenia for Civil Protection and Disasters Relief (ACPDRL) | National (Slovenia)                                                       | National, regional, municipal | 2003 - present    | Incorporation of damage to crops and property when the level of damage exceeds 0.03% of the national budget                       | Civil protection offices, environmental agencies, scientific institutions, auditors, insurance companies                       | No public access | Rudari et al., 2017     | -                                                                                                                                               |
| ADRC                       | Asian Disaster Reduction Center (ADRC)                                                        | Continental (Asia)                                                        | National, regional, municipal | 1998 – present    | Not defined                                                                                                                       | UN agencies, Reuters and international news agencies (AFP, BBC, CNN), NGOs (IFRC, Catholic Relief Services)                    | Open access      | Tschoegl et al., 2006   | <a href="https://www.adrc.asia/latest_disaster.php">https://www.adrc.asia/latest_disaster.php</a>                                               |
| Canadian Disaster Database | Office of Critical Infrastructure Protection and Emergency Preparedness (OCIEPEP)             | National (Canada + global regions, where Canadian citizens were involved) | National, regional, municipal | 1900 – present    | >10 fatalities, >100 people affected, declaration of state of emergency, historical significance, significant damage/interruption | Press media, government, provincial emergency management organizations, municipal government, Insurance Bureau of Canada, NGOs | Open access      | Tschoegl et al., 2006   | <a href="http://cddl.publicsafety.gc.ca/srchpg-eng.aspx?dynamic=false">http://cddl.publicsafety.gc.ca/srchpg-eng.aspx?dynamic=false</a>         |
| DesInventar                | United Nations Office for Disaster Risk Reduction (UNISDR)                                    | Global                                                                    | National                      | 1994 - present    | Casualties or damage                                                                                                              | NGOs, governmental institutions, civil protection agencies                                                                     | Open access      | Rudari et al., 2017     | <a href="https://www.desinventar.net/Desinventar/main.jsp?countrycode=gl5">https://www.desinventar.net/Desinventar/main.jsp?countrycode=gl5</a> |

**Table S1.** Examples of natural hazard damage databases providing information on flood impacts (continuation). This list of databases is not exhaustive.

| Database                                            | Holder institution                                                             | Spatial coverage       | Spatial resolution        | Temporal coverage | Recording thresholds                                                                                                | Data sources                                                                                                                                                          | Accessibility       | Description / reference                | URL                                                                                                                                           |
|-----------------------------------------------------|--------------------------------------------------------------------------------|------------------------|---------------------------|-------------------|---------------------------------------------------------------------------------------------------------------------|-----------------------------------------------------------------------------------------------------------------------------------------------------------------------|---------------------|----------------------------------------|-----------------------------------------------------------------------------------------------------------------------------------------------|
| DSWD-DROMIC                                         | Department of Social Welfare and Development (DWSO), Government of Philippines | National (Philippines) | Regional, municipal, city | 2006 - present    | Not defined                                                                                                         | DSWD field offices, NGOs, media                                                                                                                                       | Open access         | Tschoegl et al., 2006                  | <a href="https://dromic.dswd.gov.ph/">https://dromic.dswd.gov.ph/</a>                                                                         |
| EMA Disasters Database                              | Emergency Management Australia, Australian government                          | National (Australia)   | Administrative regions    | 1622 – present    | ≥ 3 fatalities, 20 injured or ill and/or significant damage to property, infrastructure, agriculture or environment | Government, Insurance Council of Australia, emergency service agencies, research bodies, educational institutions, press media                                        | Open access         | Tschoegl et al., 2006                  | <a href="https://knowledge.aidr.org.au/collections/australian-disasters/">https://knowledge.aidr.org.au/collections/australian-disasters/</a> |
| EM-DAT                                              | CRED, Université Catholique de Louvain, Brussels                               | Global                 | National                  | 1900 – present    | >10 fatalities, >100 people affected, declaration of state of emergency                                             | UN agencies, government organizations, Red Cross and Red Crescent Societies                                                                                           | Open access         | Kron et al., 2012; Rudari et al., 2017 | <a href="https://www.emdat.be/">https://www.emdat.be/</a>                                                                                     |
| Flood Hazard Research Centre (FHRC) damage database | Flood Hazard Research Centre (FHRC), Middlesex University, UK                  | National               | Single element at risk    | 1977 - present    | Not defined                                                                                                         | Mainly synthetic data generated by expert judgement; But also empirical data collected from: on-site expert surveys, insurance companies, government, other databases | Access upon payment | Penning-Rowse et al., 2013             | -                                                                                                                                             |

**Table S1.** Examples of natural hazard damage databases providing information on flood impacts (continuation). This list of databases is not exhaustive.

| Database                                                 | Holder institution                            | Spatial coverage                    | Spatial resolution                         | Temporal coverage | Recording thresholds                                                                                                | Data sources                                                                        | Accessibility                                                 | Description / reference                       | URL                                                                                                                             |
|----------------------------------------------------------|-----------------------------------------------|-------------------------------------|--------------------------------------------|-------------------|---------------------------------------------------------------------------------------------------------------------|-------------------------------------------------------------------------------------|---------------------------------------------------------------|-----------------------------------------------|---------------------------------------------------------------------------------------------------------------------------------|
| GLIDE                                                    | Asian Disaster Reduction Center (ADRC)        | Global                              | National, regional, municipal              | 1930 – present    | Not defined                                                                                                         | Official organizations, partners, news, publications                                | Open access                                                   | Tschoegl et al., 2006; Rudari et al., 2017    | <a href="http://www.glide-number.net">http://www.glide-number.net</a>                                                           |
| Global Active Archive of Large Flood Events              | Dartmouth Flood Observatory                   | Global                              | States, provinces, counties, towns, cities | 1985 – present    | Large floods                                                                                                        | News, government, instrumental, remote sensing                                      | Open Access                                                   | Bubeck and Kreibich, 2011; Brakenridge, 2017  | <a href="http://floodobservatory.colorado.edu/Archives/index.html">http://floodobservatory.colorado.edu/Archives/index.html</a> |
| HANZE - Historical Analysis of Natural Hazards in Europe | TU Delft, Department of Hydraulic Engineering | Continental (Europe)                | Regional (NUTS3)                           | 1870 – 2016       | Available statistics on either area flooded, fatalities, persons affected, or monetary damage                       | Publications and databases                                                          | Open access                                                   | Paprotny et al., 2018                         | <a href="https://data.4tu.nl/repository/collect ion:HANZE">https://data.4tu.nl/repository/collect ion:HANZE</a>                 |
| HOWAS21                                                  | German Research Centre for Geosciences GFZ    | National (Germany)                  | Single element at risk                     | 1978 - present    | information about the economic sector + the monetary damage + the inundation depth + the flood event + the location | On-site expert surveys, telephone interviews, insurance companies, local government | Limited access to the public; Full access to registered users | Kreibich et al., 2017; Kellermann et al. 2020 | <a href="http://howas21.gfz-potsdam.de/howas21/">http://howas21.gfz-potsdam.de/howas21/</a>                                     |
| MANDISA Database                                         | University of Cape Town (DIMP)                | Local (Cape Town Metropolitan Area) | Single element at risk                     | 1990 - 2004       | Large-, medium-, and small-sized disasters and incidents                                                            | Reports from fire services, disaster management agencies, NGOs                      | No public access                                              | Tschoegl et al., 2006                         | -                                                                                                                               |

Table S1. Examples of natural hazard damage databases providing information on flood impacts (continuation). This list of databases is not exhaustive.

| Database                   | Holder institution                            | Spatial coverage                    | Spatial resolution     | Temporal coverage | Recording thresholds                                         | Data sources                                                                                                                                                  | Accessibility                                                                               | Description / reference                     | URL                                                                                               |
|----------------------------|-----------------------------------------------|-------------------------------------|------------------------|-------------------|--------------------------------------------------------------|---------------------------------------------------------------------------------------------------------------------------------------------------------------|---------------------------------------------------------------------------------------------|---------------------------------------------|---------------------------------------------------------------------------------------------------|
| NatCatSERVICE              | Munich RE                                     | Global                              | National               | 1974 – present    | Property damage and/or person affected                       | Lloyd's, Reuters, reports from clients and branch offices, insurance press                                                                                    | Limited access to public (maps, reports, predefined analyses), extended services to clients | Kron et al., 2012; Rudari et al., 2017      | <a href="https://natcatservice.munichre.com/">https://natcatservice.munichre.com/</a>             |
| National Hazard Statistics | National Weather Service (NOAA), USA          | National                            | States                 | 1995 – present    | Information about fatalities, injuries and/or damages        | NOAA's Storm Data reports                                                                                                                                     | Open access                                                                                 | Tschoegl et al., 2006                       | <a href="http://www.nws.noaa.gov/om/hazstats.shtml">http://www.nws.noaa.gov/om/hazstats.shtml</a> |
| NDCC Database              | National Disaster Coordination Council (NDCC) | National (Philippines)              | Regional               | 1990 – present    | Not defined                                                  | Office of Civil Defense, Office of Social Welfare, local planning development offices, local emergency management offices                                     | Open access                                                                                 | Tschoegl et al., 2006                       | <a href="http://ndrrmc.gov.ph/">http://ndrrmc.gov.ph/</a>                                         |
| ÖBB damage database        | Austrian Federal Railways (ÖBB)               | National (Austria)                  | Single element at risk | 2000 - present    | Railway operation incident, damage to railway infrastructure | ÖBB Natural Hazards Management Department                                                                                                                     | No public access                                                                            | Moran et al., 2010; Kellermann et al., 2016 | -                                                                                                 |
| SHELDUS                    | University of South Carolina, USA             | National (United States of America) | County, State          | 1960 – present    | Fatalities and/or monetary loss                              | National Climatic Data Center, National Center on Environmental Information, United States Geological Survey, US Census Bureau, US Bureau of Labor Statistics | Open access by subscription                                                                 | Rudari et al., 2017; CEMHS, 2018            | <a href="https://cemhs.asu.edu/sheldus/">https://cemhs.asu.edu/sheldus/</a>                       |

**Table S1.** Examples of natural hazard damage databases providing information on flood impacts (continuation). This list of databases is not exhaustive.

| Database                                          | Holder institution                                                    | Spatial coverage       | Spatial resolution     | Temporal coverage | Recording thresholds                                                          | Data sources                                                                                      | Accessibility            | Description / reference                         | URL                                                                                                                                                                                                                                                   |
|---------------------------------------------------|-----------------------------------------------------------------------|------------------------|------------------------|-------------------|-------------------------------------------------------------------------------|---------------------------------------------------------------------------------------------------|--------------------------|-------------------------------------------------|-------------------------------------------------------------------------------------------------------------------------------------------------------------------------------------------------------------------------------------------------------|
| Sigma                                             | Swiss Reinsurance Company (SwissRe)                                   | Global                 | National               | 1970 – present    | 20 deaths and/or 50 injured and/or 2,000 homeless and/or > 35 Mio. US\$       | Newspapers, Lloyds, insurance and reinsurance periodicals, internal reports, and online databases | Limited access to public | Pfurtscheller et al., 2011, Rudari et al., 2017 | <a href="http://www.sigma-a-explorer.com">http://www.sigma-a-explorer.com</a>                                                                                                                                                                         |
| StonMe                                            | Swiss Federal Office for the Environment (BAFU)                       | National (Switzerland) | Canton                 | 1996 - present    | Injured or dead people, traffic incidents, infrastructure damage > 10,000 SFr | Historical maps and archives, road construction and railway companies                             | No public access         | Pfurtscheller et al., 2011                      | <a href="https://www.bafu.admin.ch/">https://www.bafu.admin.ch/</a>                                                                                                                                                                                   |
| Swiss flood and landslide damage database         | Swiss Federal Institute for Forest, Snow and Landscape Research (WSL) | National (Switzerland) | Municipality           | 1972 - present    | Damage causing floods, mass movements and debris flows                        | Press articles, official information from the Swiss cantons, insurance companies                  | No public access         | Hilker et al., 2009; Pfurtscheller et al., 2011 | <a href="https://www.wsl.ch/en/natural-hazards/understanding-and-forecasting-floods/flood-and-landslide-damage-database.html">https://www.wsl.ch/en/natural-hazards/understanding-and-forecasting-floods/flood-and-landslide-damage-database.html</a> |
| WLK – The Austrian Torrent and Avalanche Cadastre | Austrian Service for Torrent and Avalanche Control (WLV)              | National (Austria)     | Single element at risk | unclear - present | Not defined                                                                   | On-site surveys and reports of in-house experts                                                   | No public access         | Pfurtscheller et al., 2011; PLANALP, 2013       | <a href="https://naturgefahren.die-wildbach.at/V3/index.aspx">https://naturgefahren.die-wildbach.at/V3/index.aspx</a>                                                                                                                                 |

## References

- Brakenridge, G. R.: Global Active Archive of Large Flood Events, Dartmouth Flood Observatory, University of Colorado, available at: <http://floodobservatory.colorado.edu/Archives/index.html> (last access: 10.09.2020), 2017.
- Bubeck, P. and Kreibich, H.: Natural Hazards: Direct costs and losses due to the disruption of production processes, CONHAZ WP1 Final Report, GFZ, Potsdam, Germany, available at: [https://www.ufz.de/export/data/2/122161\\_CONHAZ%20REPORT%20WP01\\_2.pdf](https://www.ufz.de/export/data/2/122161_CONHAZ%20REPORT%20WP01_2.pdf) (last access: 10.09.2020), 2011.
- CEMHS: Spatial Hazard Events and Losses Database for the United States, Version 16.1. Phoenix, AZ, Center for Emergency Management and Homeland Security, Arizona State University, 2018.
- Hilker, N., Badoux, A., and Hegg, C.: The Swiss flood and landslide damage database 1972–2007, *Nat. Hazards Earth Syst. Sci.*, 9, 913–925, <https://doi.org/10.5194/nhess-9-913-2009>, 2009.
- Kellermann, P., Bubeck, P., Otto, A., Kundela, G., Schönberger, C., Kirnbauer, R., Schöbel, A., Aksentijevic, J., and Thieken, A. H.: Building railway transport resilience to alpine hazards, in: ENHANCE: Novel Multi-Sector Partnerships in Disaster Risk Management, Results of the ENHANCE project, edited by: Aerts, J. and Mysiak, J., EU FP7 project ENHANCE, Brussels, pp. 346, 2016.
- Kellermann, P., Schröter, K., Thieken, A.H., Haubrock, S.N. and Kreibich, H.: The object-specific flood damage database HOWAS 21, *Nat. Hazards Earth Syst. Sci.*, 2020.
- Kreibich, H., Thieken, A. H., Haubrock, S. and Schröter, K.: HOWAS 21, the German Flood Damage Database, in: Flood Damage Survey and Assessment, edited by: Molinari, D., Menoni, S., and Ballio, F., *Geoph. Monog. Series*, chap. 5, 65–75, <https://doi.org/10.1002/9781119217930.ch5>, 2017.
- Kron, W., Steuer, M., Löw, P., and Wirtz, A.: How to deal properly with a natural catastrophe database – analysis of flood losses, *Nat. Hazards Earth Syst. Sci.*, 12, 535–550, <https://doi.org/10.5194/nhess-12-535-2012>, 2012.
- Moran, A., Thieken, A., Schöbel, A., and Rachoy, C.: Documentation of flood damage on railway infrastructure, in: Data and mobility. Transforming information into intelligent traffic and transportation, edited by: Düh, J., Hufnagl, H., Juritsch, E., Pfliegl, R., Schimany, H., and Schönegger, H., Springer, 2010.
- Paprotny, D., Morales-Nápoles, O., and Jonkman, S. N.: HANZE: a pan-European database of exposure to natural hazards and damaging historical floods since 1870, *Earth Syst. Sci. Data*, 10, 565–581, <https://doi.org/10.5194/essd-10-565-2018>, 2018.
- Penning-Rowsell, E., Priest, S., Parker, D., Morris, J., Tunstall, S., Viavattene, C., Chatterton, J., and Owen, D.: Flood and Coastal Erosion Risk Management, London, Routledge, 2013.
- Pfurtscheller, C., Lochner, B., and Thieken, A. H.: Costs of Alpine Hazards, CONHAZ WP8 Final Report, Innsbruck, Austria, available at: [https://www.ufz.de/export/data/2/122168\\_CONHAZ%20REPORT%20WP08\\_1.pdf](https://www.ufz.de/export/data/2/122168_CONHAZ%20REPORT%20WP08_1.pdf) (last access: 10.09.2020), 2011.
- PLANALP: Alpine strategy for adaptation to climate change in the field of natural hazards, Platform on Natural Hazards of the Alpine Convention, Federal Office for the Environment FOEN, Bern, Switzerland, 2013.
- Rudari, R., Massabò, M., and Bedrina, T.: Overview of Loss Data Storage at Global Scale, in: Flood Damage Survey and Assessment, edited by: Molinari, D., Menoni, S., and Ballio, F., *Geoph. Monog. Series*, chap. 3, 31–51, <https://doi.org/10.1002/9781119217930.ch3>, 2017.
- Tschoegl, L., Below, R., and Guha-Sapir, D.: An Analytical Review of Selected Data Sets on Natural Disasters and Impacts, UNDP/CRED Workshop on Improving Compilation of Reliable Data on Disaster Occurrence and Impact, 2–4 April 2006, Bangkok, Thailand, available at: <http://www.cred.be/sites/default/files/TschoeglDataSetsReview.pdf> (last access: 10.09.2020), 2006.
